# Supplementary material for: Economic Indicator Assessment and Prioritization in Yazd City: A Study of Learning City Development in Iran
Source: Preprints.org preprint supplement (doi:10.20944/preprints202403.1538.v1), 2024-03-26
Supplement: Supplementary file 1 [file supplementary]

1. **Authors Declaration**
   1. **Declaration of Interest Statement**

The authors declare that they have no relevant financial or non-financial interests to disclose that could be perceived as affecting the results or interpretation of their manuscript entitled "*Economic Indicator Assessment and Prioritization in Yazd City: A Study of Learning City Development in Iran*" submitted to Urban Science Journal. The authors certify that they have followed the journal's guidelines for publication and that the manuscript has not been previously published or submitted elsewhere for consideration. The authors also confirm that all the data and materials presented in the manuscript are original and accurately reported.

- 1. **Availability of data and material**

The data and materials generated during this study are available upon reasonable request to the corresponding author. The raw data are stored securely in a password-protected database and will be provided in a de identified format to ensure confidentiality. The materials used in this study, including experimental protocols and reagents, are available upon request with appropriate material transfer agreements in place. All requests will be reviewed by the corresponding author on a case-by-case basis to ensure compliance with relevant policies and guidelines regarding data and material sharing.

The data can be accessed by contacting the corresponding author at msaraei@yazd.ac.ir, e-mail address.

- 1. **Competing interests**

The authors declare that they have no competing interests. The research presented in this manuscript was conducted independently and without any financial support.

- 1. **Funding**

The research received no external funding sources.

- 1. **Authors' contributions**

All authors contributed equally to the conception, design, and execution of this study.

- 1. **Acknowledgements**

The authors would like to thank Geography and Urban planning Faculty of Yazd University for providing access to the necessary resources and facilities for this research. However, no external funding sources or acknowledgements were received for this work beyond those mentioned above.

- 1. **Disclosure Instructions**
     1. **Declaration of Generative AI and AI-assisted technologies in the writing process**

As authors of this article, we hereby declare that we have not utilized any generative AI or AI-assisted technologies in the writing process. While the field of artificial intelligence (AI) has shown significant promise in various domains, including natural language generation and text analysis, we believe that the use of AI in academic writing requires careful consideration and adherence to established academic standards.

In line with the principles of academic integrity and scholarly rigor, we have adhered to the following guidelines:

1. **Originality**: We have ensured that all ideas, arguments, and conclusions presented in this article are original and have not been plagiarized from any other source, including AI-generated texts.
2. **Authorship**: We have taken full responsibility for the content of this article and have not delegated any significant portion of the writing process to AI or any other third party.
3. **Transparency**: We have disclosed all sources used in this article and have not relied on any AI-generated summaries or abstracts as a substitute for critical analysis and interpretation.
4. **Accuracy**: We have ensured that all facts, figures, and data presented in this article are accurate and have been verified through reliable sources.
5. **Accountability**: We acknowledge that any errors or omissions in this article are solely our responsibility and we will promptly correct them upon discovery.

We recognize that the use of AI in academic writing may become increasingly common in the future, but we believe that it is essential to maintain the integrity and credibility of academic research by adhering to these principles. As such, we encourage other authors to follow these guidelines when considering the use of AI in their own writing processes.

Sincerely,

Aimal Formolly

Ph.D. Candidate

Yazd University, Yazd, Iran

aimal.formolly@stu.yazd.ac.ir

0098 993 683 5598
